# Supplementary material
Source: MDPI journal article supplement (https://www.mdpi.com/2311-7524/9/9/961)
Supplement: s1 [file s1]

# Supplementary materials

Table S1 Standard curves of test parameters in this study.

| No. | Test parameters                   | Standard curves        | R <sup>2</sup> |
|-----|-----------------------------------|------------------------|----------------|
| 1   | glucose                           | $y = 0.0043x + 0.0243$ | 97.54%         |
| 2   | sucrose                           | $y = 0.007x + 0.00408$ | 94.06%         |
| 3   | fructose                          | $y = 0.0082x - 0.0041$ | 99.80%         |
| 4   | starch                            | $y = 0.0009x - 0.0087$ | 99.28%         |
| 5   | total phenol                      | $y = 0.0114x + 0.0578$ | 99.82%         |
| 6   | total flavonoid                   | $y = 3.9246x + 0.0111$ | 99.77%         |
| 7   | protein                           | $y = 0.0005x + 0.0062$ | 99.93%         |
| 8   | amino acid                        | $y = 16.218x - 0.0217$ | 99.91%         |
| 9   | DPPH                              | $y = 0.0076x + 0.0458$ | 99.75%         |
| 10  | ABTS                              | $y = 0.0144x + 0.0914$ | 99.70%         |
| 11  | Ferric reducing antioxidant power | $y = 0.0267x + 0.1109$ | 99.94%         |
